# Supplementary material
Source: PubMed Central journal article supplement (PMC7883934)
Supplement: NIHMS1669581-supplement-Supplementary_material.pdf [file NIHMS1669581-supplement-Supplementary_material.pdf]

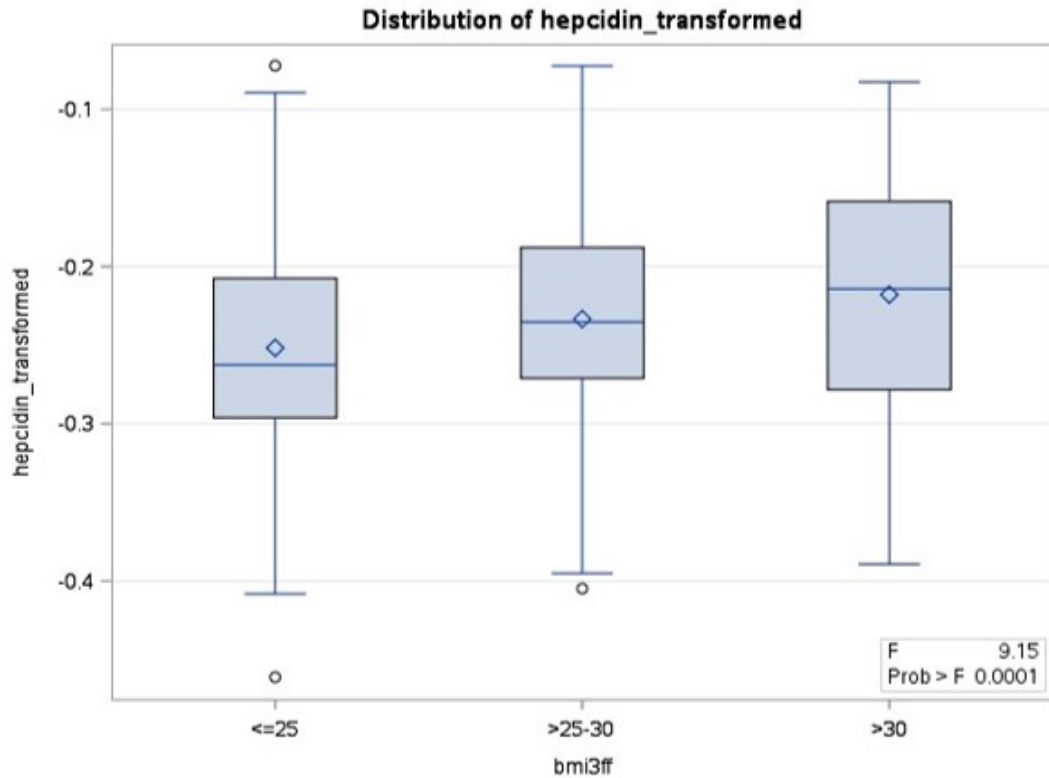

**Supplementary Figure S1.** Box plot illustrating the distribution of hepcidin by BMI (on-line only).

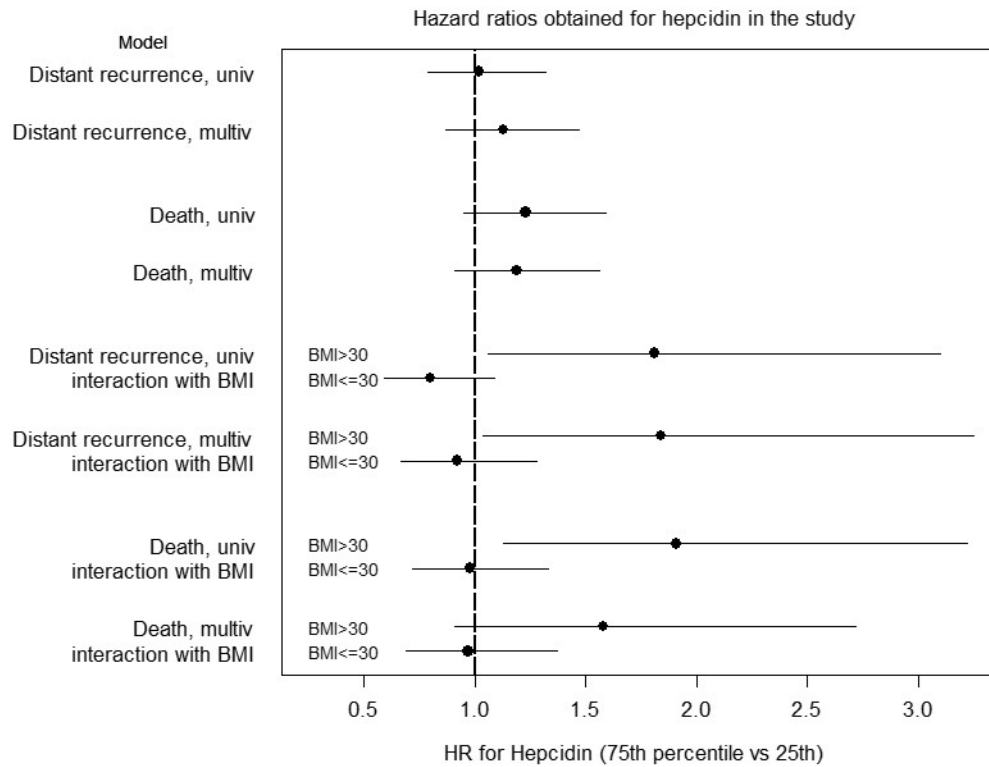

**Supplementary Figure S2.** Hazard ratios for the prognostic association of plasma hepcidin and outcomes of interest\* (online only). \*Multiv = multivariable; univ= univariable. Horizontal lines represent 95% confidence intervals.
